# Supplementary material for: Identification of the Criegee intermediate reaction network in ethylene ozonolysis: impact on energy conversion strategies and atmospheric chemistry
Source: Royal Society of Chemistry journal article supplement (doi:10.1039/c9cp00473d), 2019-01-01

## **Supplementary Material for**

# **Identification of the Criegee intermediate reaction network in ethylene ozonolysis: Impact on energy conversion strategies and atmospheric chemistry**

**by**

**Aric C. Rousso, Nils Hansen, Ahren W. Jasper, Yiguang Ju**

### **Content:**

- Mass-selected PIE curves for intermediates formed via second CI addition
- Temperature traces of selected species

## Mass-selected PIE curves for intermediates formed via second CI addition

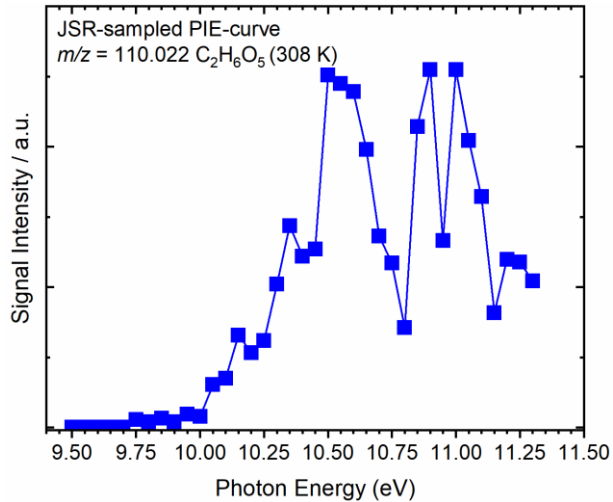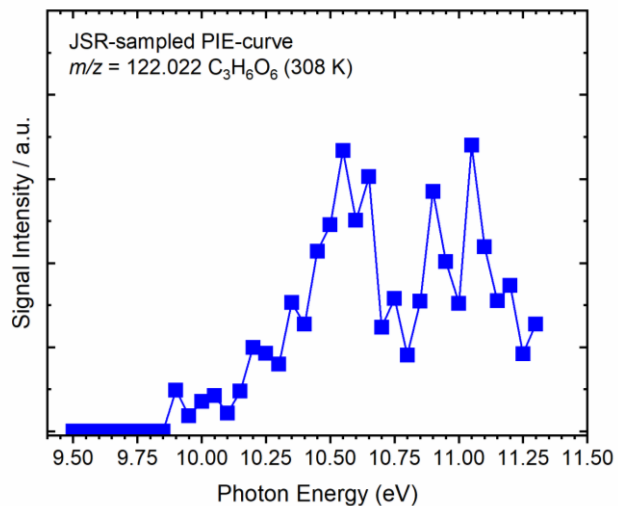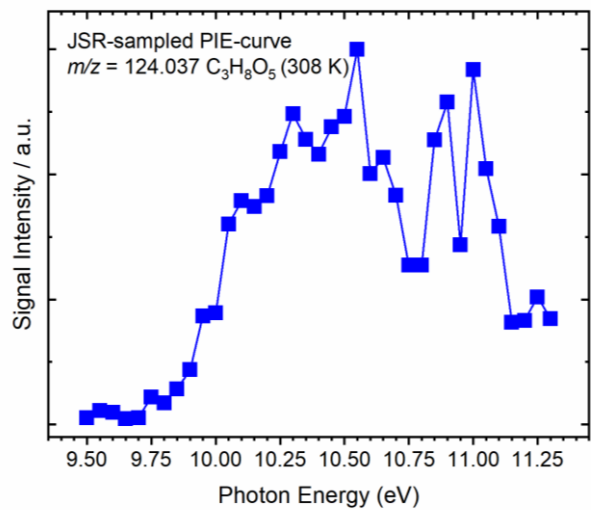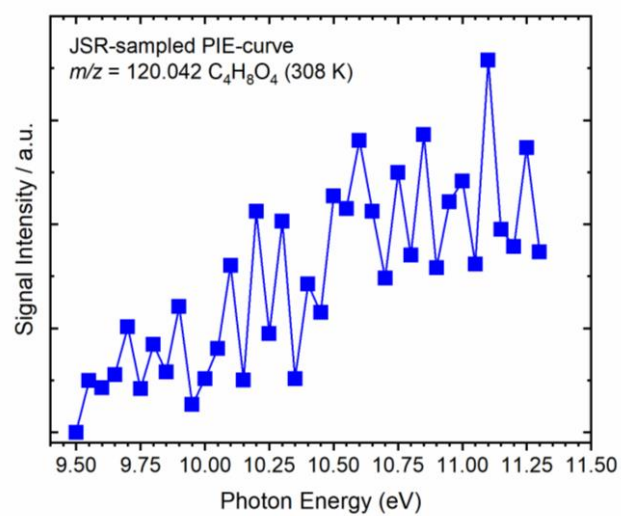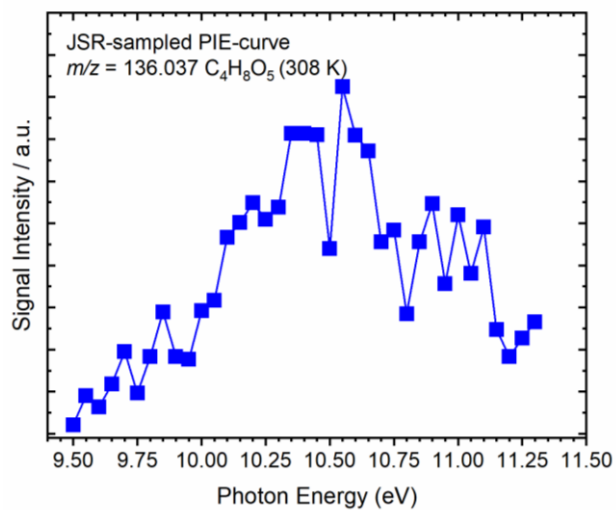

### Temperatures traces of selected species

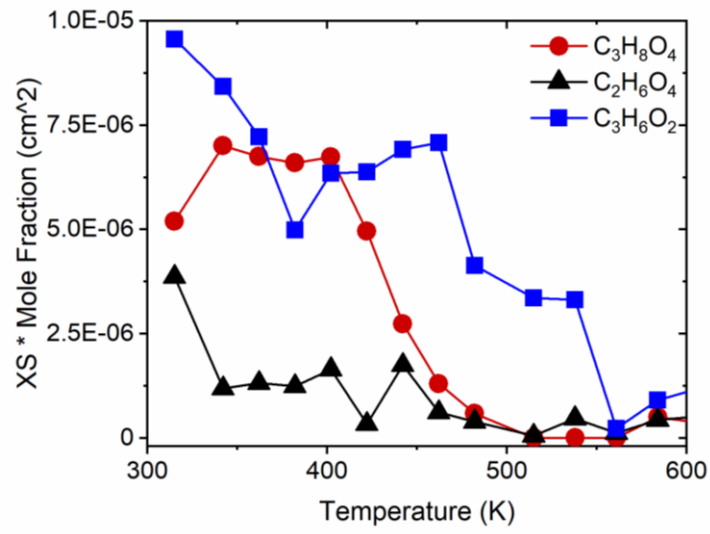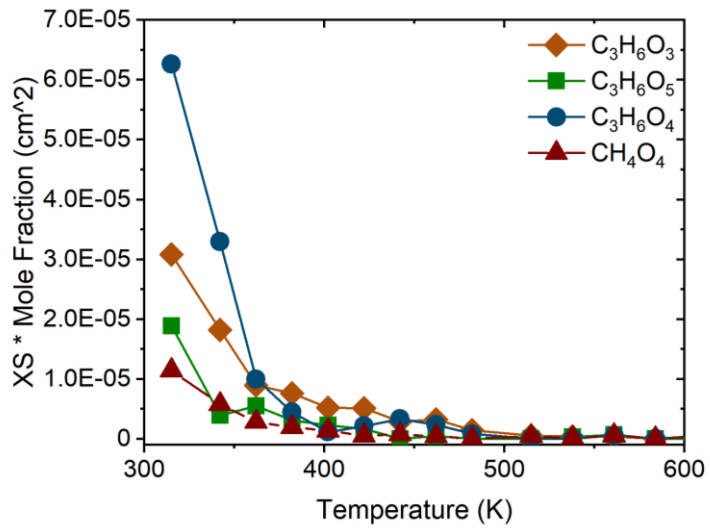

Supplement: c9cp00473d1.pdf [file c9cp00473d1.pdf]
